# Supplementary material for: Alignment of single-cell RNA-seq samples without overcorrection using kernel density matching
Source: HighWire-hosted journal article supplement (doi:10.1101/gr.261115.120), 2021-03-19
Supplement: Supplemental_Code_S1.zip [file shapiro_test.pdf › dmatch-master/docs/articles/shapiro_test.pdf]

- Pick cell clusters which have enough cells

|         | cell cluster_1 | cell cluster_2 | cell cluster_3 | cell cluster_4 | cell cluster_5 |
|---------|----------------|----------------|----------------|----------------|----------------|
| batch_2 | 272            | 340            | 389            | 141            | 44             |
| batch_1 | 230            | 1157           | 2132           | 1220           | 1050           |

- Shapiro-test for normality:  $\min_{\{PC1-PC10\}}(-\log_{10}(p\text{-value}))$

|         | cell cluster_1 | cell cluster_2 | cell cluster_3 | cell cluster_4 | cell cluster_5 |
|---------|----------------|----------------|----------------|----------------|----------------|
| batch_2 | 18.124804      | 11.454273      | 12.405844      | 3.584188       | 2.352554       |
| batch_1 | 22.64180       | 35.18335       | 27.70037       | 14.39261       | 28.84244       |
