# Supplementary material for: Alignment of single-cell RNA-seq samples without overcorrection using kernel density matching
Source: HighWire-hosted journal article supplement (doi:10.1101/gr.261115.120), 2021-03-19
Supplement: Supplemental_Table_S2.docx [file Supplemental_Table_S2.docx]

| Cell-type | No. of Phenotypic PC |
| --- | --- |
| B NAIVE | 12 |
| CD4 STIM | 10 |
| CD4 NAIVE | 10 |
| CD8 NAIVE | 6 |
| CLASSICAL MONOCYTES | 11 |
| NK CD16POS | 10 |

**Supplementary Table S2**: The number of phenotypic PCs used as covariates in our linear regression. The number of phenotypic PCs were chosen to maximize the number of eQTLs identified at 5% FDR.
